# 1 **Template switching causes artificial junction formation** 2 **and false identification of circular RNAs**

3  
4 Chong Tang<sup>1,\*,#</sup>, Tian Yu<sup>1,#</sup>, Yeming Xie<sup>1</sup>, Zhuqing Wang<sup>1</sup>, Hayden McSwiggin<sup>1</sup>, Ying  
5 Zhang<sup>1</sup>, Huili Zheng<sup>1</sup> and Wei Yan<sup>1,2,\*</sup>  
6

7 <sup>1</sup>Department of Physiology and Cell Biology, University of Nevada, Reno School of  
8 Medicine, 1664 North Virginia Street, MS575, Reno, NV 89557; <sup>2</sup>Department of Biology,  
9 University of Nevada, Reno, 1664 North Virginia Street, MS575, Reno, NV 89557, USA  
10

11  
12 #C.T. and T.Y. contributed equally to this work.  
13

14  
15 Word counts: 4,856 words  
16  
17  
18

19 \*Corresponding authors:  
20

21 Wei Yan M.D., Ph.D.  
22 *University of Nevada Reno Foundation Professor*  
23 Department of Physiology and Cell Biology  
24 University of Nevada School of Medicine  
25 Center for Molecular Medicine, Room 207B  
26 1664 North Virginia Street, MS/0575  
27 Reno, NV 89557  
28 Tel: 775 784 7765  
29 Fax: 775 784 4362  
30 Email: [wyan@medicine.nevada.edu](mailto:wyan@medicine.nevada.edu)  
31

32 &

33  
34 Chong Tang, Ph.D.  
35 *Research Assistant Professor*  
36 Department of Physiology and Cell Biology  
37 University of Nevada School of Medicine  
38 Center for Molecular Medicine, Room 216  
39 1664 North Virginia Street, MS/0575  
40 Reno, NV 89557  
41 Tel: 775 784 7765  
42 Email: [tangc3@unr.edu](mailto:tangc3@unr.edu)  
43

1 **Abstract**

2 Hundreds of thousands of putative circular RNAs have been identified through deep  
3 sequencing and bioinformatic analyses. However, the circularity of these putative RNA  
4 circles has not been experimentally validated due to limited methodologies currently  
5 available. We reported here that the template-switching capability of commonly used  
6 reverse transcriptases (e.g., SuperScript II) leads to the formation of artificial junction  
7 sequences, and consequently misclassification of large linear RNAs as RNA circles. Use  
8 of reverse transcriptases without terminal transferase activity (e.g., MonsterScript) for  
9 cDNA synthesis is critical for the identification of physiological circular RNAs. We also  
10 report two methods, MonsterScript junction PCR and high-resolution melting curve  
11 analyses, which can reliably distinguish circular RNAs from their linear forms and thus, can  
12 be used to discover and validate true circular RNAs.

13

14

15 **Keywords:** *circular RNA; terminal transferase; RNA fusion; aging; experimental artifact;*  
16 *reproducibility*

17

18

## 1 **Significance Statement**

2 The vast majority of circular RNAs were identified through computational detection of  
3 junction sequences in the deep sequencing reads because these unique fusion sequences  
4 represent back-splicing events. We found that artificial junction sequences could be  
5 formed through template switching (TS) when MMLV-derived reverse transcriptases, e.g.,  
6 SuperScript II, are used to synthesize cDNAs. Thus, many of the reported circular RNAs  
7 may not be RNA circles, but rather experimental artifacts. Fake circular RNAs can be  
8 avoided by using reverse transcriptases without terminal transferase activity (e.g.,  
9 MonsterScript) for cDNA synthesis. We developed two novel methods, MonsterScript  
10 junction PCR and high-resolution melting curve analyses, for distinguishing circular RNAs  
11 from their linear form.

12

1 \body  
2  
3 Since their discovery ~two decades ago (1), thousands of circular RNAs have been  
4 reported in various species (2, 3). Two steps critical to circular RNA identification include  
5 RNase R treatment of total RNAs prior to cDNA synthesis, and bioinformatic identification  
6 of junction sequences indicative of self-ligation of mRNA fragments (2, 4, 5). It has been  
7 shown that RNase R treatment cannot remove all linear RNAs, especially those with  
8 complex secondary structures or chemical modifications (e.g., m6A) (6). Variations in  
9 RNases R activities among batches, manufactures, and digestion conditions, can also  
10 affect the efficiency of linear RNA removal. Algorithms used to computationally identify  
11 back-splicing patterns are mostly based on features of the junction sequences in circular  
12 RNAs reported in the literature although the circularity of the vast majority of the reported  
13 circular RNAs has not been validated experimentally. Northern blot, given its  
14 independence of RNase R treatment, has been regarded as a “gold standard” for detecting  
15 circular RNAs; however, the detection sensitivity is relatively low compared to PCR-based  
16 methods, and the specificity is also limited due to the fact that junction probes can still  
17 detect linear RNAs containing partial junction sequences. In our attempt to identify and  
18 validate true RNA circles, we discovered that the template-switching capability of commonly  
19 used reverse transcriptases could lead to false positive identification of junction sequences  
20 and consequently misclassification of large linear RNAs as RNA circles. We report here  
21 that the use of MonsterScript, a thermostable reverse transcriptase with neither RNase H  
22 nor terminal transferase activity, for reverse transcription during library construction and  
23 PCR-based analyses, can minimize false positive identification of circular RNAs, and the

1 circularity of RNAs can be validated using both MonsterScript junction PCR and high-  
2 resolution melting curve analyses.

3

## 4 **Results and Discussion**

5

### 6 **Template switching caused by terminal transferase activity of commonly used** 7 **reverse transcriptases**

8 In addition to DNA polymerase activity, the commonly used reverse transcriptases,  
9 including both MMLV- [e.g., SuperScript II (Thermo Fisher), ProtoScript II (NEB),  
10 PrimeScript (Clontech), GoScript (Promega), etc.] and AMV-derived ones, all possess  
11 terminal transferase activity, which can add several non-templated nucleotides to the 3' end  
12 of cDNAs, leading to *template switching* (TS) during reverse transcription (RT) (**Fig. 1A**).

13 The TS events can generate artificial junctions derived from the same linear RNA templates  
14 and these linear RNAs would be erroneously identified as RNA circles during bioinformatic  
15 annotation (**Fig. 1A**). We tested numerous reverse transcriptases and also modified the  
16 RT steps by utilizing Mung Bean nuclease, exonuclease VII or T7 endonuclease to trim the  
17 cDNA 3' ends to minimize TS events, but all failed to distinguish between the circular and  
18 linear forms of the same control RNA (*SI Appendix, Fig. S1*). Therefore, use of MMLV-  
19 derived reverse transcriptases during RT inevitably generates artificial junction sequences  
20 as long as the linear RNAs are present in the reactions.

21

### 22 **MonsterScript does not cause template switching during reverse transcription**

23 Interestingly, we found that template switching did not occur when MonsterScript, a  
24 thermostable reverse transcriptase with neither RNase H nor terminal transferase activity,

1 was used for reverse transcription. We first used MonsterScript to replace SuperScript II in  
2 5' RACE assays, and found that MonsterScript failed to detect the 5' ends (*SI Appendix*,  
3 *Fig. S2*). Given that the 5' RACE assay relies on the template switching property of  
4 SuperScript II to detect the 5' end sequences, this result suggests that MonsterScript does  
5 not cause template switching. With control linear (*in vitro* transcription products of a  
6 luciferase plasmid) and circular RNAs (self-ligation products of linear luciferase RNA  
7 treated with RNase R) as templates, convergent primers successfully amplified the junction  
8 region of both SuperScript II and MonsterScript RT products of the control circular RNA  
9 (**Fig. 1B**). However, PCR using divergent primers consistently amplified the SuperScript II,  
10 but not the MonsterScript RT products of the control linear RNA (**Fig. 1B**). Sanger  
11 sequencing confirmed that the divergent PCR products of SuperScript II cDNAs from the  
12 control linear RNA contained insertions and mutations resulting from TS events (**Fig. 1C**).

13 RNase R has been routinely used to enrich circular RNAs. However, we noticed that  
14 RNase R treatment could not completely eliminate false positive detection of TS-derived  
15 junctions in divergent PCR on Superscript II RT products of control linear RNA despite our  
16 many attempts using RNase R from different vendors (**Fig. 1B, lower panels**). This is  
17 consistent with a recent report showing that RNase R treatment cannot remove all linear  
18 RNAs, especially those with complex secondary structures or chemical modifications (e.g.,  
19 m6A)(6). In fact, RNase R treatment appeared to decrease the detection efficiency of  
20 MonsterScript junction PCR, probably due to hydrolysis of circular RNAs by combined  
21 catalytic activity of temperature and magnesium ions (7).

22 To see whether the difference reflects lowered detection sensitivity of MonsterScript,  
23 we performed junction PCR using SuperScript II and MonsterScript RT products from the  
24 control linear RNA and a previously validated circular RNA, *Cdr1as(3)*. Similar robustness

1 was observed between SuperScript II and MonsterScript (**Fig. 1D**), suggesting that the  
2 failure for MonsterScript to detect false positive junction sequences is not due to lower  
3 sensitivity compared to SuperScript II.

4 To further demonstrate the extent to which TS events occur during cDNA synthesis,  
5 we constructed libraries using SuperScript II and MonsterScript and performed RNA-Seq  
6 on the ERCC RNA Spike-In Mix (Invitrogen), which contained 96 synthetic linear RNAs with  
7 variable lengths, GC contents and amounts. Under similar sequencing depths (~45 million  
8 reads), both methods yielded similar read counts (**Fig. 2A**). Based on junction sequences  
9 detected, 20 artificial circular RNAs were identified from libraries constructed using  
10 SuperScript II, whereas none was found in the MonsterScript libraries (**Fig. 2B**). Certain  
11 sequencing depth was required to start to see noises (i.e., artificial circular RNAs) and the  
12 noise-to-signal ratios increased up to  $10^{6.5}$  reads, and then started to decrease with the  
13 increasing sequencing depth in SuperScript II libraries of the 96 spike-in linear RNAs (**Fig.**  
14 **2C**). In contrast, the noise-to-signal ratios were constantly low in MonsterScript libraries  
15 (**Fig. 2C**). These data suggest that MonsterScript, unlike the most commonly used MMLV-  
16 derived reverse transcriptases, e.g., SuperScript II, does not cause template switching and  
17 thus, can be used to identify biological rather than artificial circular RNAs.

18

### 19 **Library construction using MonsterScript minimizes false identification of circular** 20 **RNAs**

21 To further evaluate the utility of the MonsterScript-based circular RNA identification  
22 protocol, we constructed mouse brain libraries using rRNA-depleted, RNase R-treated total  
23 RNAs followed by RT using MonsterScript and SuperScript II, respectively. Under similar  
24 sequencing depths (~50 million reads), both methods yielded similar read counts (**Fig. 2D**).

1 We then compared our circular RNA annotation results with those reported in an earlier  
2 report (8), which identified 7,638 putative circular RNAs from mouse brain using rRNA-  
3 depleted total RNAs and SuperScript II. Our analyses using age-matched, whole brain  
4 tissue of the same mouse strain identified 5,256 putative circular RNAs from SuperScript II  
5 libraries, among which 1,958 overlapped with those reported in the published paper (8). In  
6 sharp contrast, only 127 circular RNAs could be annotated from libraries constructed using  
7 MonsterScript (**Fig. 2E**), 61 of which were those reported in the published paper (8). These  
8 results suggest that the vast majority of the putative circular RNAs identified from  
9 SuperScript II-constructed libraries might be artifacts caused by template switching-induced  
10 junction sequences. Consistent with this notion, >90% of the putative circular RNAs  
11 identified in the previous report (8) displayed low junction reads ratios, which are, in  
12 general, suggestive of false positive (**Fig. 2E**). In contrast, the junction reads ratios in  
13 MonsterScript libraries were much higher (**Fig. 2E**). By analyzing the junction sequences  
14 of the artificial circular RNAs (i.e., those identified from SuperScript II-derived cDNA  
15 libraries of Spike-In linear RNAs) and the most likely true/biological circular RNAs (i.e., 72  
16 circular RNAs shared between SuperScript II and MonsterScript brain libraries), we  
17 identified five significant motifs, all of which appeared to be GC-rich (**Fig. 2F**), a pattern well  
18 documented to be common in MMLV reverse transcriptases-induced template switching  
19 (9).

20

21 **High-resolution melting analyses can distinguish between circular RNAs from their**  
22 **linear forms**

23 Although Northern blots have been regarded as a “gold standard” for circular RNAs  
24 validation (5), the method is less useful for low abundance or high-throughput analyses. As



1 an alternative to Northern blots, we explored the utility of high-resolution melting (HRM)  
2 analyses to determine RNA circularity (**Fig. 3**). The HRM analyses have been previously  
3 employed to detect m6A nucleoside (10), and we modified the method such that a  
4 quencher probe quenches the fluorescence of a FAM probe when they anneal to the  
5 junction site of a circular RNA in a head-to-head orientation. During a gradual increase of  
6 temperature, the dark quencher oligo dissociates from the template at a specific  
7 temperature, thus allowing emission of fluorescence from the FAM probe (**Fig. 3A**). Since  
8 the quencher and the FAM probes anneal to the tail and head of the corresponding linear  
9 form, respectively, the fluorescence only weakly fluctuates without significant peaks during  
10 the melting process (**Fig. 3B**). Given that the heights of the fluorescence peaks correlate  
11 with the input of control circular RNAs (0.1ng, 1ng and 10ng) in a linear fashion (**Fig. 3C**),  
12 the HRM analyses can also be used for quantitative analyses of circular RNAs based on  
13 the linear relationship between the height of the fluorescence peaks and the input of the  
14 control circular RNAs (**Fig. 3C**). Although this method can reliably distinguish RNA circles  
15 from their linear forms, specific probes need to be synthesized for individual circular RNAs,  
16 which are costly and may not be convenient for high throughput analyses. Nevertheless,  
17 the HRM analyses provide an alternative for distinguishing circular RNAs from their linear  
18 forms. This feature is important because it has been reported that many circular RNAs are  
19 co-expressed with their corresponding linear forms and the circular forms become much  
20 more enriched with aging (3, 8, 11), and there is no reliable method which can distinguish  
21 between circular and linear forms of the same sequences.

22

23 **Both MonsterScript junction PCR and high-resolution melting analyses can reliably**  
24 **determine RNA circularity**

1 To test the robustness of the two new methods (i.e., MonsterScript junction PCR and HRM  
2 analyses), as compared to the traditional Northern blots, in determining the circularity of  
3 RNAs, we examined levels of a previously validated, brain-enriched circular RNA,  
4 *mmu\_circ\_0011529*(8), in old (2-year-old) and young (4-month-old) brain samples (**Fig. 4**).  
5 Junction PCR using total mouse brain cDNAs synthesized by SuperScript II detected  
6 *mmu\_circ\_0011529* in both young and old brain samples with similar abundance, whereas  
7 this circular RNA was exclusively detectable in old mouse brain samples when  
8 MonsterScript-synthesized cDNAs were used for junction PCR (**Fig. 4A**). This result is  
9 consistent with that of previous Northern blots showing enrichment of this circular RNA in  
10 aged organs(3, 8). Northern blot analyses of *mmu\_circ\_0011529* detected a band in old  
11 mouse brain, which was higher than that in young brain (**Fig. 4B**), suggesting that true  
12 circular RNA *mmu\_circ\_0011529* and its linear form are expressed in old and young mouse  
13 brain, respectively. Further supporting this notion, HRM analyses detected circular RNA  
14 *mmu\_circ\_0011529* in old brain, but not in young brain (**Fig. 4C**). Sanger sequencing of  
15 the PCR products from SuperScript and MonsterScript junction PCR (**Fig. 4A**) detected  
16 true *mmu\_circ\_0011529* sequence in old brain cDNAs synthesized by either SuperScript or  
17 MonsterScript II, whereas an insertion was identified in SuperScript II junction PCR  
18 products from young brain, indicative of TS activity of SuperScript II (**Fig. 4D**). These data  
19 indicate that both MonsterScript junction PCR and HRM analyses can reliably distinguish  
20 circular RNAs from their linear forms.

21 We further analyzed >80 circular RNAs selected from the circBase based on their  
22 enrichment in the brain and testis of aged mice (3, 8, 11) (*SI Appendix, Fig. S3*).  
23 Interestingly, ~95% of these circular RNAs were detected in old testis and brain samples by  
24 MonsterScript junction PCR (*SI Appendix, Fig. S3*), suggesting that the aged testis and

1 brain indeed express these RNA circles. However, although SuperScript junction PCR  
2 detected almost all of these RNAs in young testis and brain samples, MonsterScript  
3 junction PCR could only confirm a small fraction (<30%) (*SI Appendix, Fig. S3*), supporting  
4 the notion that these RNAs are expressed as linear RNAs in young mice, but become RNA  
5 circles with aging. Taken together, our data suggest that in addition to Northern blots, both  
6 MonsterScript junction PCR and HRM can be alternative methods for determining  
7 circularity of large RNAs.

8 In summary, we experimentally demonstrated that the commonly used reverse  
9 transcriptases can cause template switching, leading to false positive identification of  
10 junction sequences and consequently misclassification of linear RNAs as RNA circles. The  
11 problem can be avoided, at least partially, by using MonsterScript for library construction  
12 and circular RNA discovery, and MonsterScript junction RT-PCR in conjunction with HRM  
13 for circular RNA validation.

14

## 15 **Materials and Methods**

16

17 **Animals.** All mice used in this study were on the C57BL/6J background, and housed  
18 under specific pathogen-free conditions in a temperature- and humidity-controlled animal  
19 facility at the University of Nevada, Reno. Animal use protocol was approved by  
20 Institutional Animal Care and Use Committee (IACUC) of the University of Nevada, Reno  
21 (Protocol number 00494), and are in accordance with the “Guide for the Care and Use of  
22 Experimental Animals” established by National Institutes of Health (NIH) (1996, revised  
23 2011).

24

1 **Preparation of RNA.** Total RNA was isolated using the mirVana total RNA extraction kit  
2 (Cat#: AM1560, Ambion) following the manufacturer's protocol. The HiScribe T7 High-  
3 Yield RNA Synthesis Kit (Cat#: E2040S, NEB) was used for *in vitro* transcription to  
4 synthesize the control linear RNAs with the FLuc control plasmid as the template. The  
5 control linear RNAs were circled using T4 RNA ligase 1 (Cat#M0204S, NEB) to  
6 generate circular RNAs. Sequences of the control plasmid, linear and circular RNAs can  
7 be found in *SI Appendix, File S1*.

8  
9 **RT-PCR analyses of linear and circular RNAs.** Cellular RNAs or synthetic control linear  
10 or circular RNAs were reverse transcribed using MonsterScript (Cat# MS041050,  
11 Epicentre) and SuperScript II (Cat# 18064014, Thermo Fisher) in a reaction containing the  
12 following reagents: 4 $\mu$ l 5xBuffer (supplementing 10mM DTT for SuperScript II), 1 $\mu$ l dNTP,  
13 1 $\mu$ l reverse transcriptase, 1 $\mu$ l control RNA, 1 $\mu$ l Smarter IIA oligo (10 $\mu$ M), 1 $\mu$ l gene-specific  
14 primer (10 $\mu$ M), 11 $\mu$ l water. The reverse transcription was performed in 25°C 10min, 42°C  
15 30 min, 65°C 30min, 85°C 5min. PCR was performed using GoTaq DNA polymerase (Cat#  
16 M3001, Promega) and convergent/divergent primers at the annealing temperature of 55°C.  
17 The PCR products were visualized with agarose gel electrophoresis. Primer sequences can  
18 be found in *SI Appendix, Table S1*. The DNA ladder is 100bp DNA Ladder H3 RTU  
19 (GeneDireX).

20  
21 **RNase R treatment.** Control linear and circular RNAs (100ng) were incubated with or  
22 without 20U of RNase R (Cat#RNR07250, Epicentre) in the reaction buffer for 1h at 37°C.  
23 The treated RNA samples were purified using the RNeasy Mini Kit (Cat#74104, Qiagen)

1 and quantified. Equal amounts of RNA were then subjected to reverse transcription using  
2 the SuperScript II or MonsterScript and the random hexamer followed by PCR.

3  
4 **Reverse transcriptase sensitivity assay.** For measuring the relative efficiency of the two  
5 reverse transcriptases (SuperScript II and MonsterScript), the control linear RNA or RNase  
6 R-treated brain total RNAs were diluted to generate serial 5/10-fold dilutions, ranging from  
7 5ng to 1pg. Reverse transcription was performed using MonsterScript and SuperScript II  
8 followed by real-time PCR on an ABI 7900HT qPCR system using convergent primers.  
9 The Ct values were converted to log<sub>10</sub> values for generating the linear regression plots.

10  
11 **RNA-seq.** For RNA-seq analyses, SuperScript II libraries were constructed using the  
12 KAPA Stranded RNA-Seq Kit (Cat#KK8483, Kapabiosystems) after ribosome depletion  
13 with RiboErase (Cat#KK8483, Kapabiosystems). To construct MonsterScript libraries for  
14 RNA-seq, SuperScript II included in the Kit was substituted with MonsterScript. The linear  
15 spike-in control was purchased from Thermo Fisher (Cat#4456740). All the samples were  
16 run in the same lane for deep sequencing on an Illumina NextSeq sequencer with PE75 in  
17 the Nevada Genomic Center.

18  
19 **Linear RNA annotation.** The sequence reads of the control linear RNAs (i.e., spike-in  
20 RNAs) was mapped to the reference sequences by Tophat2(12). RNA-seq reads of mouse  
21 tissues were mapped to the UCSC mm9 genome by Tophat2(12). The mapped bam files  
22 were counted though Subread/featureCounts(13). The counts of each gene were imported  
23 into Deseq2(14), followed by normalization through regularized logarithm (rlog). We used  
24 the ggplot2 packages(15) to generate plots.

1  
2 **Circular RNA annotation.** Sequencing reads of the spike-in control were mapped to spike-  
3 in reference sequences using bwa (bwa mem -T 19)(16). RNA-seq reads of mouse brain  
4 were mapped to UCSC mm9 genome by bwa (bwa mem -T 19(16). CIRI2(17) was used  
5 for circular RNA annotation (CIRI\_v2.0.1.pl --no\_strigency -l bwa.sam -O ciritout -F  
6 bwaindex/genome.fa).

7  
8 **Motif analysis.** The supported circular RNA reads were extracted from raw data. The  
9 junction reads with lowest junction reads ratio (<0.01) were likely the false positive ones in  
10 the spike-in RNA-Seq analyses. The junction reads with highest junction reads ratio (>0.7)  
11 were mostly the true positive reads (MonsterScript RNA-Seq on the aged mouse brain). We  
12 analyze the template-switching motifs using false-positive reads against the control, true  
13 positive reads. The motif analyses were performed using *motifRG*(18). Five significant  
14 motifs were identified and all appeared to be GC-rich, a pattern that has been documented  
15 to be common in MMLV reverse transcriptase-induced template switching(9).

16  
17 **Northern blot.** The Northern blot experiments were performed using NorthernMax Kit  
18 (Ambion) and detected using Biotin Chromogenic Detection Kit (Thermo Scientific),  
19 following the manufactures' instructions. For the sensitivity experiment, biotin-labeled DNA  
20 probes spanning the whole control RNA was generated using Biotin DecaLabel DNA  
21 Labeling Kit (Thermo Scientific), following the manufacture's recommended protocol. The  
22 FLuc linear DNA plasmid was used as template for probe generation. Heat denatured 1.8kb  
23 control FLuc RNA was used. For Northern blot using single junction probes, single biotin-  
24 labeled oligo probes were ordered from IDT and used to detect the linear control RNA. For

1 Northern blot detection of circular RNA mmu\_circ\_0011529, a mixture of 8 biotin-labeled  
2 probes were use. 2µg of mouse total brain RNA were loaded on each lane for each sample.  
3 For probe sequences please see *SI Appendix, Table S2*.

4  
5 **High-resolution melting (HRM) analysis.** The probe mix contains 10µM FAM probe and  
6 20µM quencher probe. RNA was mixed with 2µl of probe mix, 10µl of 10X hybridization  
7 buffer (1M NaCl, 0.1M Tris-HCl), and RNase-free water to a final concentration of 100µl.  
8 The samples were analyzed in 7900HT Fast Real-Time PCR System (Applied Biosystems)  
9 and incubated as follows: 75°C for 5min, cool down to 25°C for 15s, ramp heating to 85°C  
10 at 2%. Data collection was set during the ramp heating and at 85°C.

11

## 12 **ACKNOWLEDGEMENTS**

13 This work was supported by grants from the NIH (HD071736 and HD085506 to WY) and  
14 the Templeton Foundation (PID: 50183 to WY). RNA-Seq and bioinformatics were  
15 conducted in the Single Cell Genomics Core of University of Nevada, Reno School of  
16 Medicine, which was supported, in part, by a COBRE grant from the NIH  
17 (1P30GM110767).

18

## 19 **AUTHOR CONTRIBUTIONS**

20 C.T. and W.Y. designed the research. C.T., T.Y., Y.Z. and H.Z. performed the  
21 experiments. All participated in data analyses. C.T. and W.Y. wrote the manuscript. All  
22 reviewed the manuscript.

23

## 24 **COMPETING FINANCIAL INTERESTS**

1 The authors declare no competing financial interest.

2



## 1 REFERENCES

- 2
- 3 1. Capel B, *et al.* (1993) Circular transcripts of the testis-determining gene Sry in adult  
4 mouse testis. *Cell* 73(5):1019-1030.
- 5 2. Jeck WR & Sharpless NE (2014) Detecting and characterizing circular RNAs. *Nat*  
6 *Biotechnol* 32(5):453-461.
- 7 3. Memczak S, *et al.* (2013) Circular RNAs are a large class of animal RNAs with  
8 regulatory potency. *Nature* 495(7441):333-338.
- 9 4. Hansen TB, Veno MT, Damgaard CK, & Kjems J (2016) Comparison of circular RNA  
10 prediction tools. *Nucleic Acids Res* 44(6):e58.
- 11 5. Szabo L & Salzman J (2016) Detecting circular RNAs: bioinformatic and  
12 experimental challenges. *Nat Rev Genet* 17(11):679-692.
- 13 6. Panda AC, *et al.* (2017) High-purity circular RNA isolation method (RPAD) reveals  
14 vast collection of intronic circRNAs. *Nucleic Acids Res*.
- 15 7. AbouHaidar MG & Ivanov IG (1999) Non-enzymatic RNA hydrolysis promoted by the  
16 combined catalytic activity of buffers and magnesium ions. *Z Naturforsch C* 54(7-  
17 8):542-548.
- 18 8. You X, *et al.* (2015) Neural circular RNAs are derived from synaptic genes and  
19 regulated by development and plasticity. *Nat Neurosci* 18(4):603-610.
- 20 9. Zajac P, Islam S, Hochgerner H, Lonnerberg P, & Linnarsson S (2013) Base  
21 preferences in non-templated nucleotide incorporation by MMLV-derived reverse  
22 transcriptases. *PLoS One* 8(12):e85270.
- 23 10. Golovina AY, *et al.* (2014) Method for site-specific detection of m6A nucleoside  
24 presence in RNA based on high-resolution melting (HRM) analysis. *Nucleic Acids*  
25 *Res* 42(4):e27.
- 26 11. Glazar P, Papavasileiou P, & Rajewsky N (2014) circBase: a database for circular  
27 RNAs. *RNA* 20(11):1666-1670.
- 28 12. Trapnell C, Pachter L, & Salzberg SL (2009) TopHat: discovering splice junctions  
29 with RNA-Seq. *Bioinformatics* 25(9):1105-1111.
- 30 13. Liao Y, Smyth GK, & Shi W (2014) featureCounts: an efficient general purpose  
31 program for assigning sequence reads to genomic features. *Bioinformatics*  
32 30(7):923-930.
- 33 14. Love MI, Huber W, & Anders S (2014) Moderated estimation of fold change and  
34 dispersion for RNA-seq data with DESeq2. *Genome Biol* 15(12):550.
- 35 15. Wickham H (2009) *ggplot2: Elegant Graphics for Data Analysis*. (Springer-Verlag,  
36 New York).
- 37 16. Li H & Durbin R (2009) Fast and accurate short read alignment with Burrows-  
38 Wheeler transform. *Bioinformatics* 25(14):1754-1760.
- 39 17. Gao Y, Wang J, & Zhao F (2015) CIRI: an efficient and unbiased algorithm for de  
40 novo circular RNA identification. *Genome Biol* 16:4.
- 41 18. Yao Z, *et al.* (2014) Discriminative motif analysis of high-throughput dataset.  
42 *Bioinformatics* 30(6):775-783.
- 43

1 **FIGURE LEGENDS**

2

3 **Fig. 1 Junction formation due to template-switching (TS) when commonly used**  
4 **reverse transcriptases (e.g., SuperScript II) are used for cDNA synthesis. (A)**

5 Schematic presentation of the mechanism through which the terminal transferase activity of  
6 MMLV-derived reverse transcriptases (e.g., SuperScript II) can add several non-templated  
7 nucleotides to the 3' end of cDNA, leading to TS during reverse transcription (RT). The TS  
8 events can generate artificial junctions derived from the same linear RNA templates and  
9 these linear RNAs would be erroneously identified as RNA circles in bioinformatic analyses.

10 **(B)** PCR detection of the junction sequences from SuperScript II or MonsterScript RT  
11 products of both control circular (sample 1) and linear (sample 2) RNAs using convergent  
12 and divergent primers, respectively (upper left half panel). PCRs using internal primers  
13 were used as loading controls (upper right half panel). The lower panels show results after  
14 RNase R treatment of the control linear and circular RNAs. **(C)** Sanger sequencing of the  
15 PCR products. Note that the divergent PCR products of SuperScript II cDNAs from the  
16 control linear RNA contained insertions and mutations resulting from TS events, whereas  
17 both SuperScript II and MonsterScript convergent PCR products were from the true RNA  
18 ligation junctions of the control circular RNA. Fluc, control luciferase RNA; MS,  
19 MonsterScript; SSII: SuperScript II. **(D)** Reverse transcriptase efficiency assays using the  
20 control linear RNA (left panel) and a previously validated circular RNA, *Cdr1as* (right  
21 panel). RNAs were reverse transcribed using SuperScript II and MonsterScript, followed by  
22 qPCR using the internal primers (for control linear RNA) and junction primers (for *Cdr1as*),  
23 respectively. CT values were plotted against log<sub>10</sub> values of RNA inputs and SuperScript II  
24 and MonsterScript displayed similar sensitivity in detecting either linear or circular RNAs.

1 **Fig. 2 Deep sequencing analyses of control linear RNAs and RNAs from young (4-**  
2 **month-old) and old (2-year-old) brain samples. (A)** Similar performance of RNA-Seq  
3 analyses on a library of 96 linear RNAs (ERCC RNA Spike-In Mix) using SuperScript II and  
4 MonsterScript. Data represent mean values of duplicated experiments. **(B)** Twenty artificial  
5 circular RNAs were identified from SuperScript II, but none from MonsterScript libraries of  
6 the ERCC RNA Spike-In Mix based on junction sequences. **(C)** Relationship between  
7 sequencing depth and noise-to-signal ratios of SuperScript II vs. MonsterScript-based  
8 library construction protocols for circular RNA identification. Sequencing data of the ERCC  
9 RNA Spike-In Mix were used for this analysis. **(D)** The scatter plot showing sequencing  
10 count distribution of all the genes detected in the duplicated libraries constructed using the  
11 two reverse transcriptases (MonsterScript and SuperScript II) using RNAs from brains  
12 samples of young (4-month-old) and old (2-year-old) mice. **(E)** Venn diagram showing the  
13 putative circular RNAs identified from mouse brain by a previous (8) and the present  
14 studies using SuperScript II- and MonsterScript-based library construction protocols.  
15 Junction reads ratios in mouse brain libraries from a previous and the present studies using  
16 SuperScript II and MonsterScript-based library construction protocols. **(F)** Potential motifs  
17 found in the junction sequences of artificial circular RNAs.

18  
19 **Fig. 3 Detection and quantification of circular RNAs using high-resolution melting**  
20 **(HRM) analyses. (A)** A dark quencher probe quenches the fluorescence of a FAM probe  
21 when they anneal to the junction site of a circular RNA in a head-to-head orientation.  
22 During a gradual increase of temperature, the dark quencher oligo dissociates from the  
23 template at a specific temperature, thus allowing emission of fluorescence from the FAM  
24 probe. Using our control circular RNA for HMR analyses, we observed a significant

1 fluorescence peak at ~45°C. **(B)** Since the quencher and the FAM probes anneal to the tail  
2 and head of the corresponding linear form, respectively, the fluorescence only weakly  
3 fluctuates without significant peaks during the melting process. **(C)** HMR-based  
4 quantitative analyses of circular RNAs. Heights of the fluorescence peaks correlate with  
5 the input of the control circular RNAs (0.1ng, 1ng and 10ng) in a linear fashion. No obvious  
6 peaks were observed in the negative (linear RNA) and probe-only (background) controls.  
7 Therefore, the HRM analyses can be used to quantify circular RNAs as well.

8

9 **Fig. 4 Validation of RNA circularity using Northern blot, MonsterScript junction PCR**

10 **and HRM analyses.** **(A)** Junction PCR using SuperScript II-synthesized cDNAs from  
11 RNase R-treated total RNA detected mmu\_circ\_0011529 in brain of both young (4-month-  
12 old) and old (2-year-old) mice with similar abundance, whereas this RNA was only detected  
13 in old, but not in young mouse brain when MonsterScript-synthesized cDNAs were used for  
14 junction PCR. **(B)** Northern blot analyses of mmu\_circ\_0011529 in old and young mouse  
15 brain samples using a probe from the junction site. Note that the band in the old brain  
16 sample was higher than that in the young brain sample, suggesting that the RNA detected  
17 in the old brain sample is the true circular RNA mmu\_circ\_0011529, whereas the one in the  
18 young brain sample is likely its linear form. **(C)** HRM analyses of mmu\_circ\_0011529 in old  
19 and young mouse brain samples. Circular RNA mmu\_circ\_0011529 was detected in old  
20 brain, but not in young brain. Note that the fluorescent peak results from disassociation of  
21 the quenching probe from the circular RNA at the junction site. **(D)** Sanger sequencing of  
22 the PCR products from SuperScript and MonsterScript junction PCR detected true  
23 mmu\_circ\_0011529 sequence in old brain cDNAs synthesized by either SuperScript or

- 1 MonsterScript II, whereas an insertion was identified in SuperScript II junction PCR
- 2 products from young brain, indicative of TS activity of SuperScript II.
- 3

Fig. 1

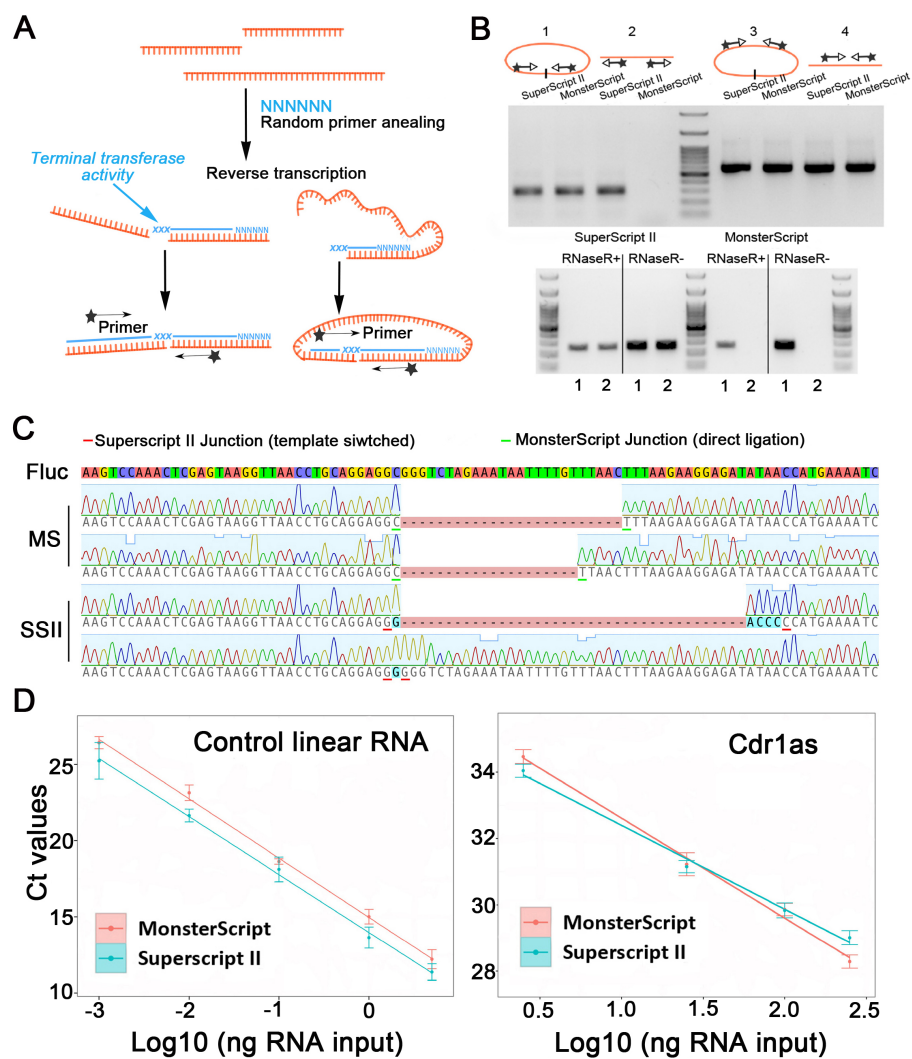

Fig. 2

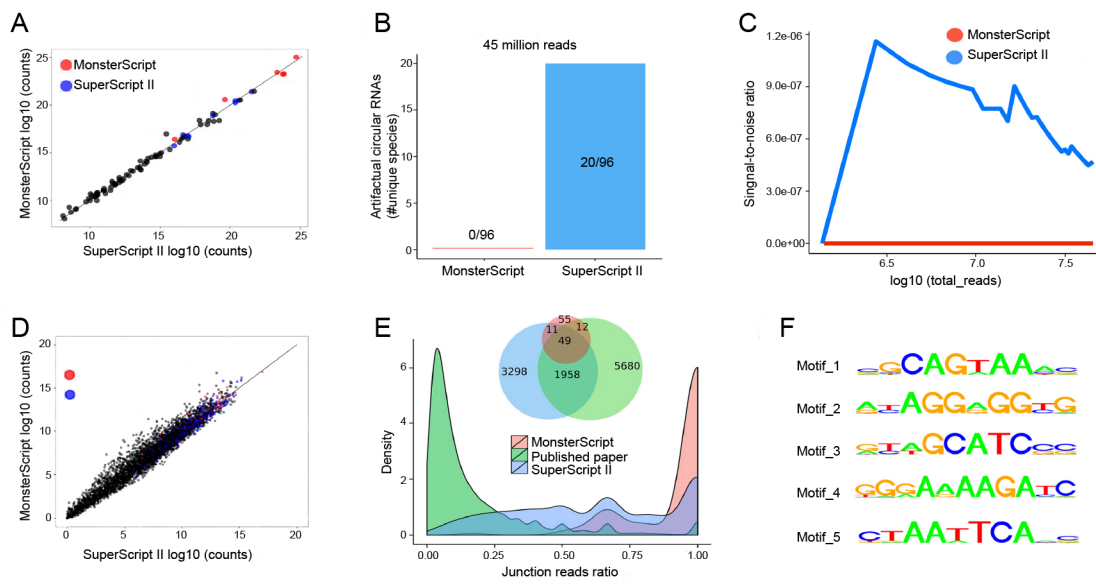

Fig. 3

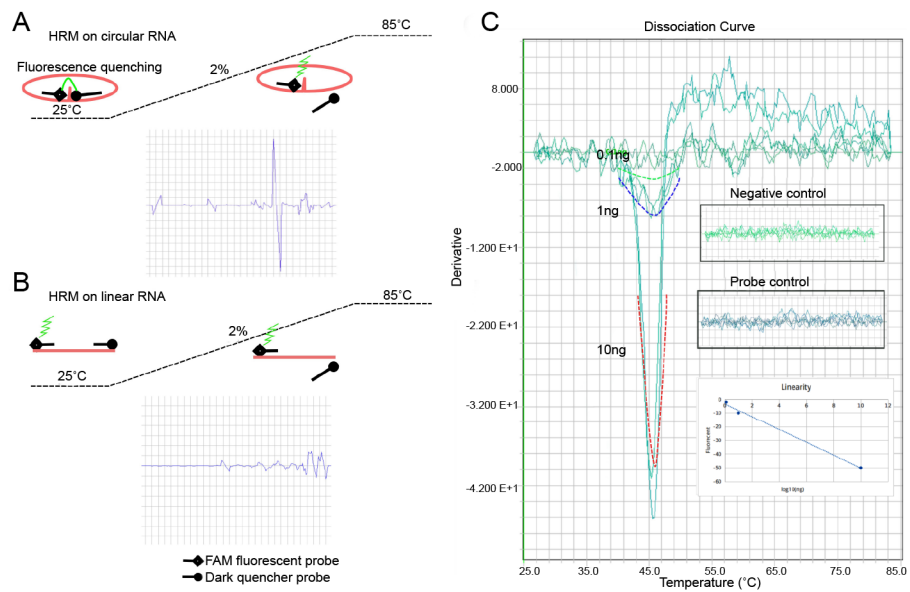



Fig. 4

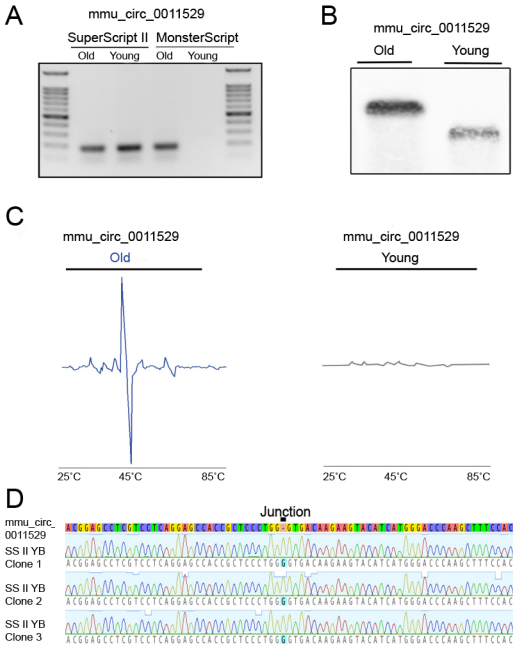

Source: https://www.biorxiv.org/content/10.1101/259556v1.full.pdf
